# Supplementary figures and images for: Mesoporous silica thin films as a spatially extended probe of interfacial electric fields for amplified signal transduction in surface plasmon resonance spectroscopy
Source: Royal Society of Chemistry journal article supplement (doi:10.1039/b600140h), 2006-01-01

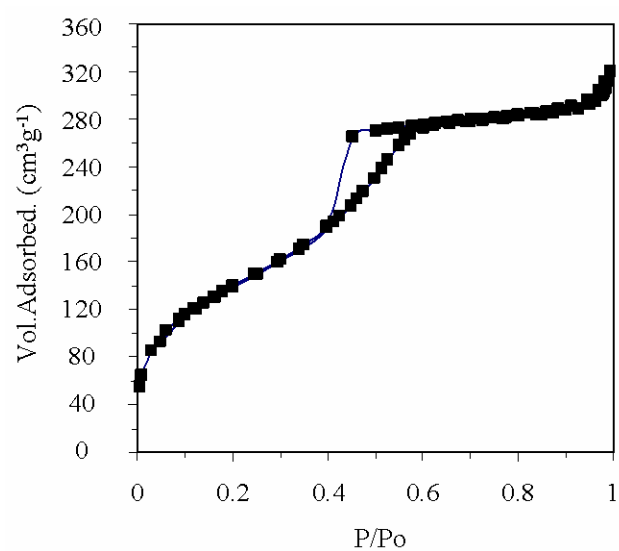

Fig. S Nitrogen adsorption/desorption isotherm of concomitantly prepared powder samples.

Supplement: b600140h.pdf [file b600140h.pdf]
